# Supplementary material for: Salt–solvent synchro-constructed robust electrolyte–electrode interphase for high-voltage lithium metal batteries
Source: Royal Society of Chemistry journal article supplement (doi:10.1039/d2ta02267b), 2022-01-01
Supplement: d2ta02267b1.pdf [file d2ta02267b1.pdf]

## **Salt-solvent synchro-constructed robust electrolyte-electrode interphase for high-voltage lithium metal batteries**

Mingming Fang<sup>1,2,3,4</sup>, Juner Chen<sup>2,3,4</sup>, Boyang Chen<sup>1,2,3</sup>, Jianhui Wang<sup>\*1,2,3</sup>

1. School of Materials Science & Engineering, Zhejiang University, Hangzhou 310024, China

2. Key Laboratory of 3D Micro/Nano Fabrication and Characterization of Zhejiang Province,  
School of Engineering, Westlake University, Hangzhou 310024, China

3. Institute of Advanced Technology, Westlake Institute for Advanced Study, Hangzhou 310024,  
China

4. These authors contributed equally

\*Corresponding Author: Jianhui Wang

Email: wangjianhui@westlake.edu.cn

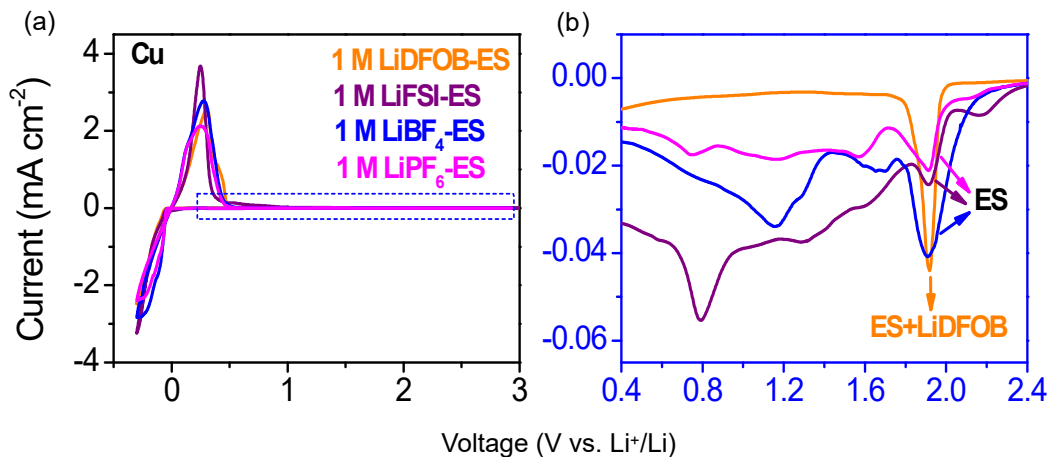

**Fig. S1** CV curves of a Cu electrode in different electrolytes at a scanning rate of 0.2 mV s<sup>-1</sup>. For the electrolytes of 1 M LiBF<sub>4</sub>-ES, 1 M LiPF<sub>6</sub>-ES and 1 M LiFSI-ES, a significant reduction current remained after the reduction decomposition of ES at 1.9 V, indicating that the ES-derived SEI alone is not compact enough.

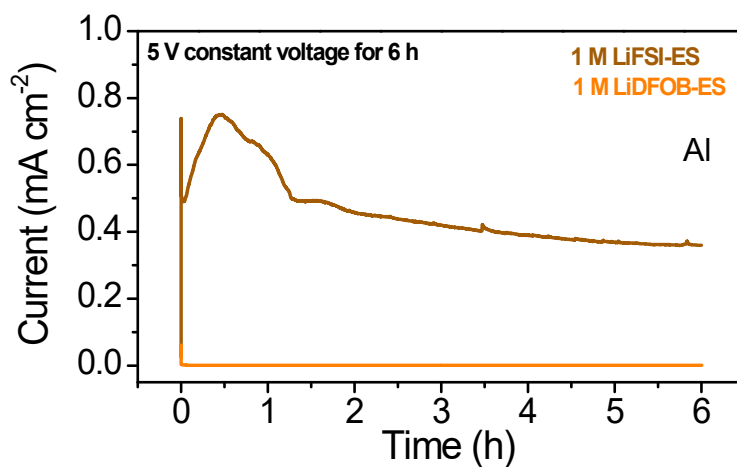

**Fig. S2** The leakage current density dependent of time in a chronoamperometry test of an electrode at 5 V. The Al electrode suffered from severe anodic Al dissolution in 1 M LiFSI-ES electrolyte, whereas no anodic dissolution of Al occurred in 1 M LiDFOB-ES electrolyte.

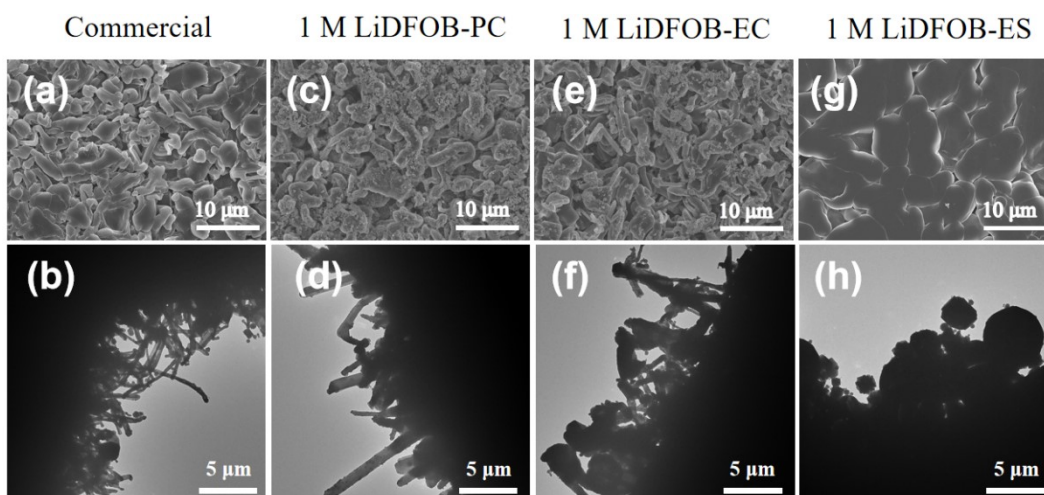

**Fig. S3** SEM (a, c, e and g) and Cryo-EM (b, d, f and h) images of the morphology of lithium deposition in different electrolytes with a capacity of  $0.25 \text{ mAh cm}^{-2}$  at  $0.5 \text{ mA cm}^{-2}$ .

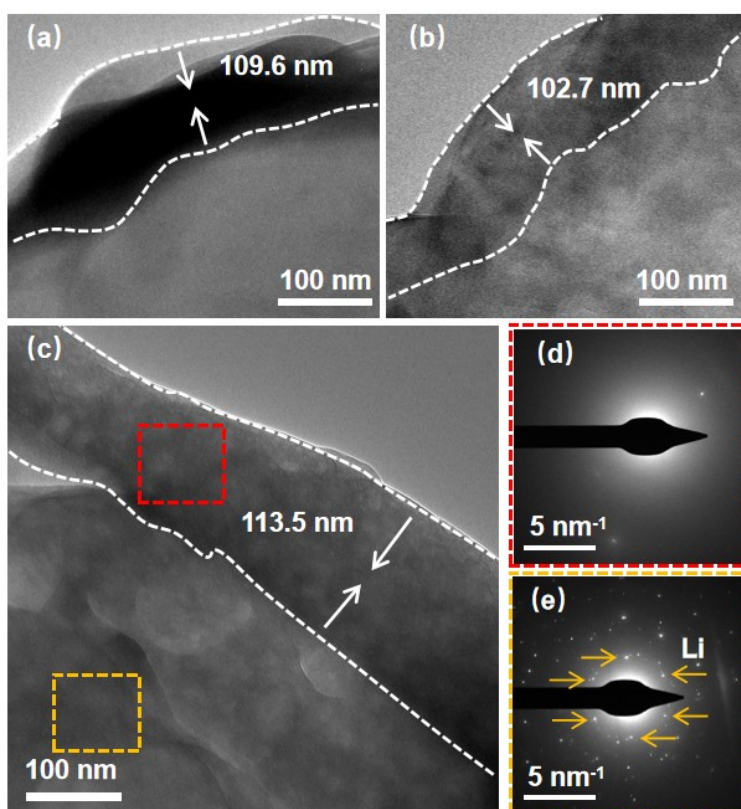

**Fig. S4** (a-c) Cryo-EM images of SEI on the Li metal after 50 cycles in 1 M LiDFOB-PC electrolyte. (d, e) Electron diffraction images of the selected region in (c): d, red square; e, yellow square.

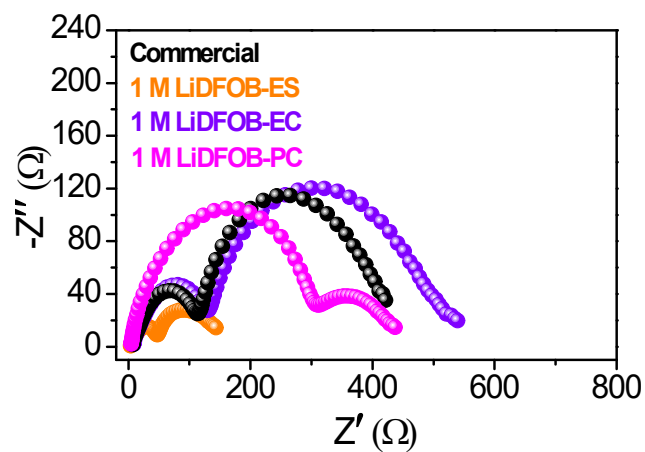

**Fig. S5** Electrochemical impedance spectra of Li||Li symmetric cells using different electrolytes after 50 cycles.

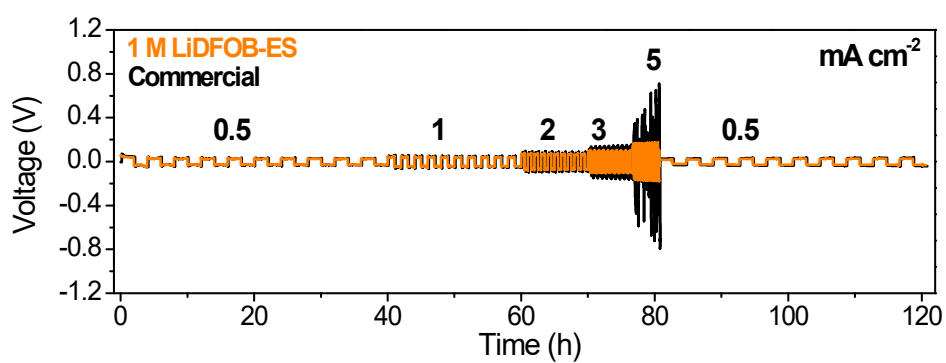

**Fig. S6** Rate profile for Li||Li symmetric cells using 1 M LiDFOB-ES and commercial (1 M LiPF<sub>6</sub>/EC:DMC (1:1 by vol.)) electrolyte. Li||Li cells at current density from 0.5 to 5 C, 1 C=1 mA cm<sup>-2</sup>.

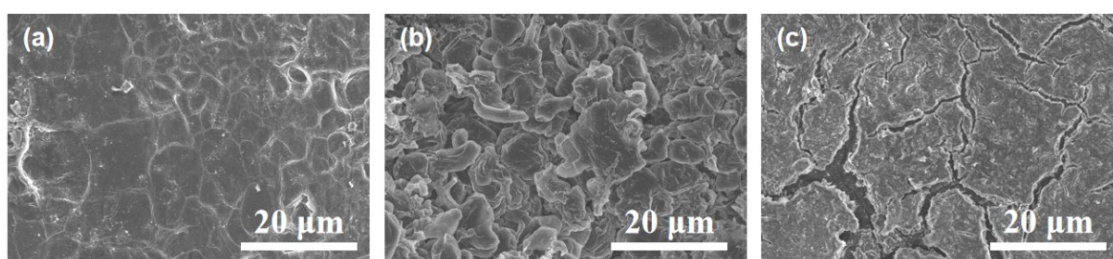

**Fig. S7** SEM images of the morphologies of the Li metal anode harvested from the Li||Li symmetric cells after 50 cycles in (a) 1 M LiDFOB-ES, (b) 1 M LiDFOB-EC, (c) 1 M LiDFOB-PC electrolytes.

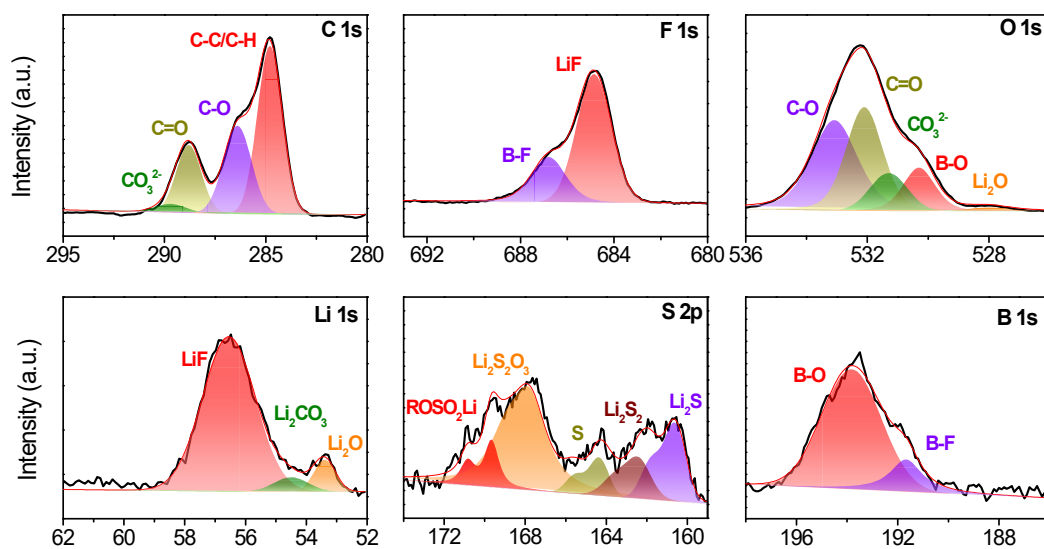

**Fig. S8** XPS spectra of Li metal anodes after 100 cycles in 1 M LiDFOB-ES electrolyte.

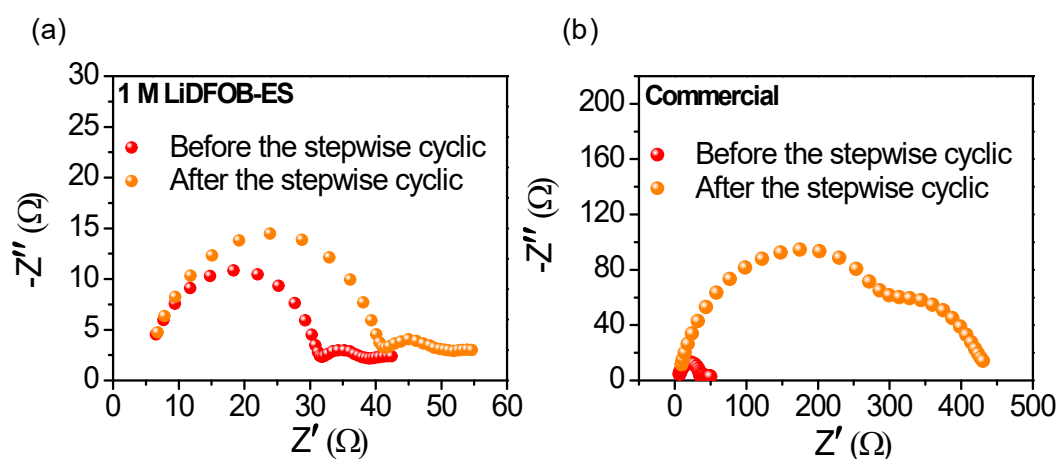

**Fig. S9** Electrochemical impedance spectra of NCM622||Li half-cells before and after voltage-stepwise cycling from 4.3 V to 4.7 V in (a) 1 M LiDFOB-ES and (b) Commercial electrolytes.

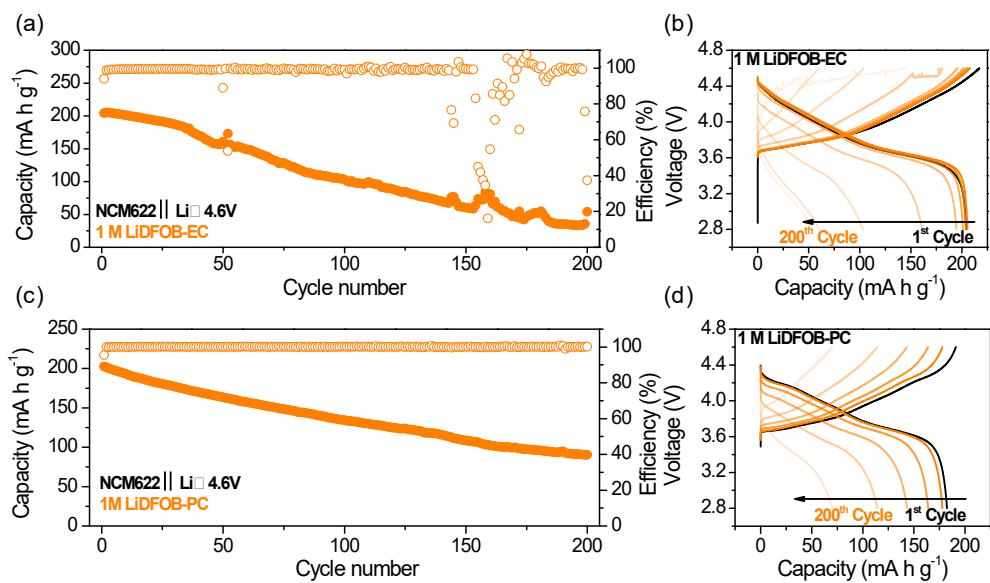

**Fig. S10** Cycling performance and voltage profiles of the NCM622 | Li half-cells using (a, b) 1 M LiDFOB-EC and (c, d) 1 M LiDFOB-PC.

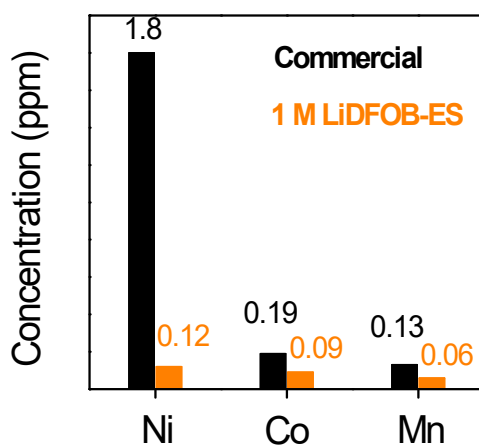

**Fig. S11** Transition metal dissolution measured by ICP-MS after 400 cycles in 1 M LiDFOB-ES and Commercial electrolytes.

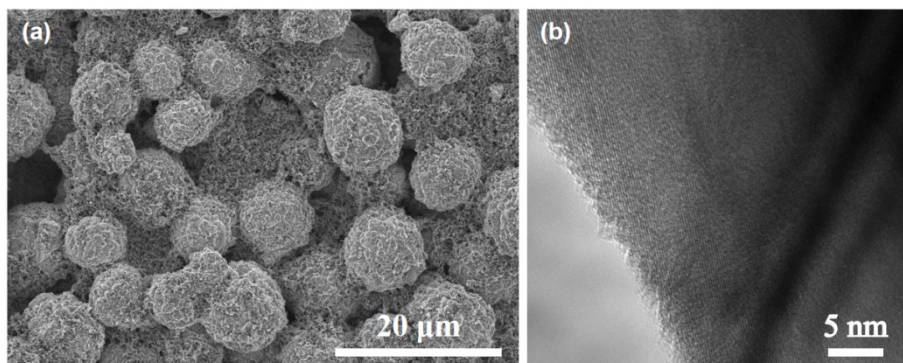

**Fig. S12** (a) SEM and (b) TEM images of Pristine NCM622 particles.

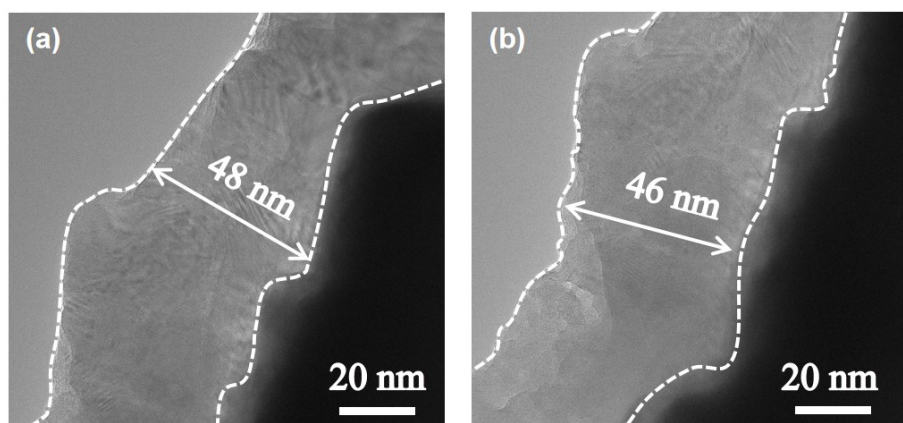

**Fig. S13** TEM image of NCM622 electrode after 100 cycles in (a) 1 M LiDFOB-EC electrolyte and (b) 1 M LiDFOB-PC electrolytes.

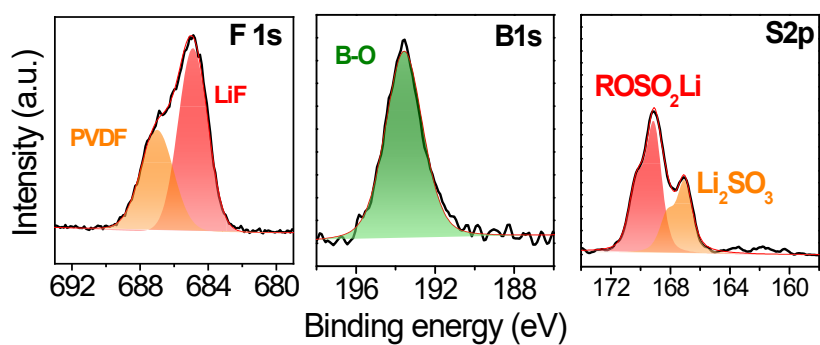

**Fig. S14** XPS chemical analysis of CEI layers for the cycled NCM622 in 1 M LiDFOB-ES electrolytes.

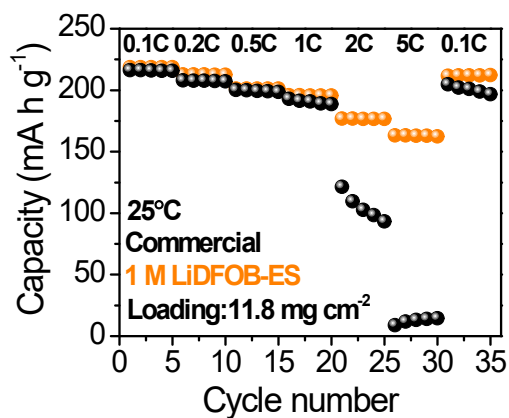

**Fig. S15** Rate performance of NMC622||Li full-cells using 1 M LiDFOB-ES and commercial electrolytes at 25 °C.

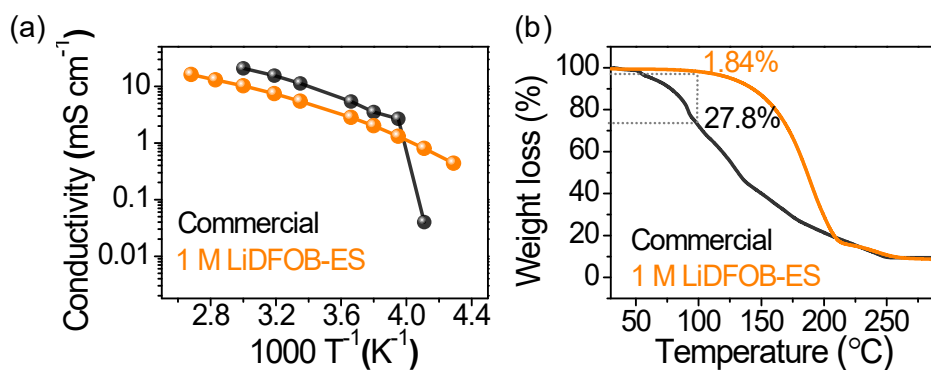

**Fig. S16** (a) Ionic conductivities and (b) TGA curves of the 1 M LiDFOB-ES and commercial electrolytes.



**Table S1.** Ionic conductivities of 1 M LiDFOB-ES and commercial electrolytes at different temperatures

| Electrolytes         | Ionic conductivities (mS cm <sup>-1</sup> ) |        |        |        |        |      |       |       |       |       |        |
|----------------------|---------------------------------------------|--------|--------|--------|--------|------|-------|-------|-------|-------|--------|
|                      | -50 °C                                      | -40 °C | -30 °C | -20 °C | -10 °C | 0 °C | 25 °C | 40 °C | 60 °C | 80 °C | 100 °C |
| <b>1 M LiDFOB-ES</b> | 0.032                                       | 0.44   | 0.8    | 1.31   | 2.01   | 2.83 | 5.47  | 7.38  | 10.21 | 12.94 | 16.11  |
| <b>Commercial</b>    | -                                           | -      | 0.04   | 2.87   | 4.5    | 6.42 | 12    | 18    | 20    | *     | *      |

\* These values were underestimated because a significant amount of electrolyte was ejected from the cell by the accumulated pressure inside the cell at elevated temperatures.

**Table S2.** Comparison of our work with prior work on high-voltage NMC || Li batteries

| Electrolyte                                                                |                                           | Cell parameters                                                                 |                                         |           | Battery performance                                       |                                                                      |                  |
|----------------------------------------------------------------------------|-------------------------------------------|---------------------------------------------------------------------------------|-----------------------------------------|-----------|-----------------------------------------------------------|----------------------------------------------------------------------|------------------|
| Electrolyte                                                                | Ionic conductivity (mS cm <sup>-1</sup> ) | Cathode/anode                                                                   | Cathode loading (mAh cm <sup>-2</sup> ) | N/P ratio | Cycle stability (25 °C)                                   | Rate performance (25 °C)                                             | Test temperature |
| 1 M LiDFOB-ES<br>(Our work)                                                | 25 °C: 5.47<br>-40 °C: 0.44               | NCM622/<br>Li                                                                   | 2.5                                     | 4         | 4.6 V, 0.5 C :<br>88.2% (200 cycles),<br>92% (100 cycles) | 0.1 C: 218.6 mA h g <sup>-1</sup><br>5 C: 163.3 mA h g <sup>-1</sup> | -30-60 °C        |
| LiFSI-1.2DME-3TTE.<br>Ref: [1]                                             | 25 °C: 2.44                               | NCM811/<br>Li                                                                   | 4.2                                     | 2.38      | 4.4 V, 0.33 C :<br>>80% (150 cycles)                      | 0.1 C: 210 mA h g <sup>-1</sup><br>6 C: 110 mA h g <sup>-1</sup>     | 25 °C            |
| 1 m LiFSI-DMTMSA.<br>Ref: [2]                                              | 30 °C: 1.37                               | NCM811/<br>Li                                                                   | 4                                       | 0.39      | 4.7 V, 0.5 C :<br>88.1% (100 cycles)                      | 0.1 C: 231 mA h g <sup>-1</sup><br>2 C: 186 mA h g <sup>-1</sup>     | 25 °C            |
| 1 M LiFSI-DME-TFEO.<br>Ref: [3]                                            | 25 °C: 1.1                                | NCM811/<br>Li                                                                   | 1.5                                     | 5.9       | 4.4 V, 0.33 C :<br>80% (300 cycles)                       | 0.1 C: 231 mA h g <sup>-1</sup><br>4 C: 137 mA h g <sup>-1</sup>     | 25-55 °C         |
| LiFSI-1.5DMC-1.5TTE.<br>Ref: [4]                                           | 25 °C: 1.7                                | NCM622/<br>Li                                                                   | 1.5                                     | half-cell | 4.6 V, 2 C :<br>80.1% (200 cycles)                        | 0.2 C: 204 mA h g <sup>-1</sup><br>5 C: 125 mA h g <sup>-1</sup>     | 25-60 °C         |
| 10 M LiFSI-EC-DMC.<br>Ref: [5]                                             | -                                         | NCM622/<br>Li                                                                   | 2.5                                     | half-cell | 4.6 V, 0.1 C :<br>86% (100cycles)                         | 0.1 C: 225 mA h g <sup>-1</sup>                                      | 25 °C            |
| 0.6 M LiTFSI+0.4 M<br>LiBOB+0.05LiPF <sub>6</sub> -EC-<br>EMC.<br>Ref: [6] | -                                         | LiNi <sub>0.76</sub> Mn <sub>0.14</sub> Co <sub>0.1</sub><br>O <sub>2</sub> /Li | 0.9                                     | half-cell | 4.5 V, 0.33 C :<br>90% (200cycles)                        | 0.1 C: 220 mA h g <sup>-1</sup><br>5 C: 129 mA h g <sup>-1</sup>     | 30 °C            |
| 1 M LiPF <sub>6</sub> -FEC-FEMC.<br>Ref: [7]                               | 20 °C: 0.2                                | NCM523/<br>Li                                                                   | 1.75                                    | half-cell | 4.7 V, 0.2 C :<br>81% (200 cycles)                        | 0.2 C: 190 mA h g <sup>-1</sup><br>2 C: 100 mA h g <sup>-1</sup>     | 25 °C            |
| 1 M LiPF <sub>6</sub> -EC-DEC-<br>EMC-10wt% FEC.<br>Ref: [8]               | -                                         | NCM622/<br>Li                                                                   | -                                       | half-cell | 4.6 V, 1 C :<br>87.3% (100 cycles)                        | 0.2 C: 222 mA h g <sup>-1</sup><br>5 C: 140 mA h g <sup>-1</sup>     | 25 °C            |
| 1 M LiBF <sub>4</sub> -FEC-SN.<br>Ref: [9]                                 | -                                         | NCM523/<br>Li                                                                   | -                                       | half-cell | 4.7 V, 0.5 C :<br>73.6% (100 cycles)                      | 0.5 C: 185 mA h g <sup>-1</sup><br>5 C: 90 mA h g <sup>-1</sup>      | 25 °C            |
| 8.67 m LiBF <sub>4</sub> -DMC.<br>Ref: [10]                                | -                                         | NCM523/<br>Li                                                                   | -                                       | half-cell | 4.6 V, 0.1 C :<br>92.2% (50 cycles)                       | 0.1 C: 200 mA h g <sup>-1</sup><br>5 C: 90 mA h g <sup>-1</sup>      | 25 °C            |

Note: The mark “-” means the corresponding information was not provided in the literatures.

M: mol L<sup>-1</sup>; m: mol kg<sup>-1</sup>.

## References

- 1 X. Ren, L. Zou, X. Cao, M. H. Engelhard, W. Liu, S. D. Burton, H. Lee, C. Niu, B. E. Matthews, Z. Zhu, C. Wang, B. W. Arey, J. Xiao, J. Liu, J.-G. Zhang and W. Xu, *Joule*, 2019, **3**, 1662-1676.
- 2 W. Xue, M. Huang, Y. Li, Y. G. Zhu, R. Gao, X. Xiao, W. Zhang, S. Li, G. Xu, Y. Yu, P. Li, J. Lopez, D. Yu, Y. Dong, W. Fan, Z. Shi, R. Xiong, C.-J. Sun, I. Hwang, W.-K. Lee, Y. Shao-Horn, J. A. Johnson and J. Li, *Nat. Energy*, 2021, **6**, 495-505.
- 3 X. Cao, X. Ren, L. Zou, M. H. Engelhard, W. Huang, H. Wang, B. E. Matthews, H. Lee, C. Niu, B. W. Arey, Y. Cui, C. Wang, J. Xiao, J. Liu, W. Xu and J.-G. Zhang, *Nat. Energy*, 2019, **4**, 796-805.
- 4 N. Piao, X. Ji, H. Xu, X. Fan, L. Chen, S. Liu, M. N. Garaga, S. G. Greenbaum, L. Wang, C. Wang and X. He, *Adv. Energy Mater.*, 2020, **10**, 1903568.
- 5 X. Fan, L. Chen, X. Ji, T. Deng, S. Hou, J. Chen, J. Zheng, F. Wang, J. Jiang, K. Xu and C. Wang, *Chem*, 2018, **4**, 174-185.
- 6 W. Zhao, J. Zheng, L. Zou, H. Jia, B. Liu, H. Wang, M. H. Engelhard, C. Wang, W. Xu, Y. Yang and J. G. Zhang, *Adv. Energy Mater.*, 2018, **8**, 1800297
- 7 J. Im, J. Lee, M.-H. Ryou, Y. M. Lee and K. Y. Cho, *J. Electrochem. Soc.*, 2017, **164**, A6381-A6385.
- 8 L. Liu, S. Wang, Z. Zhang, J. Fan, W. Qi and S. Chen, *Ionics*, 2018, **25**, 1035-1043.
- 9 Q. Zhang, K. Liu, F. Ding, W. Li, X. Liu and J. Zhang, *Electrochim. Acta*, 2019, **298**, 818-826.
- 10 T. Doi, R. Matsumoto, Z. Cao, M. Haruta, M. Hashinokuchi and M. Inaba, *Sustain. Energy Fuels*, 2018, **2**, 1197-1205.
